# Supplementary material
Source: PubMed Central journal article supplement (PMC7035183)

# Full unedited gels

Fig. 3

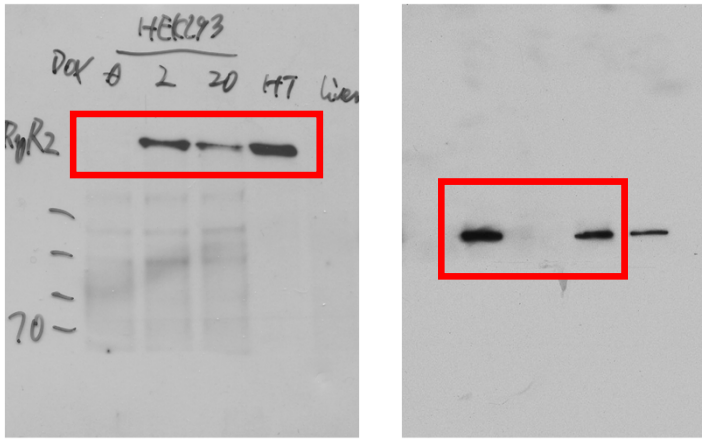

Fig. 5

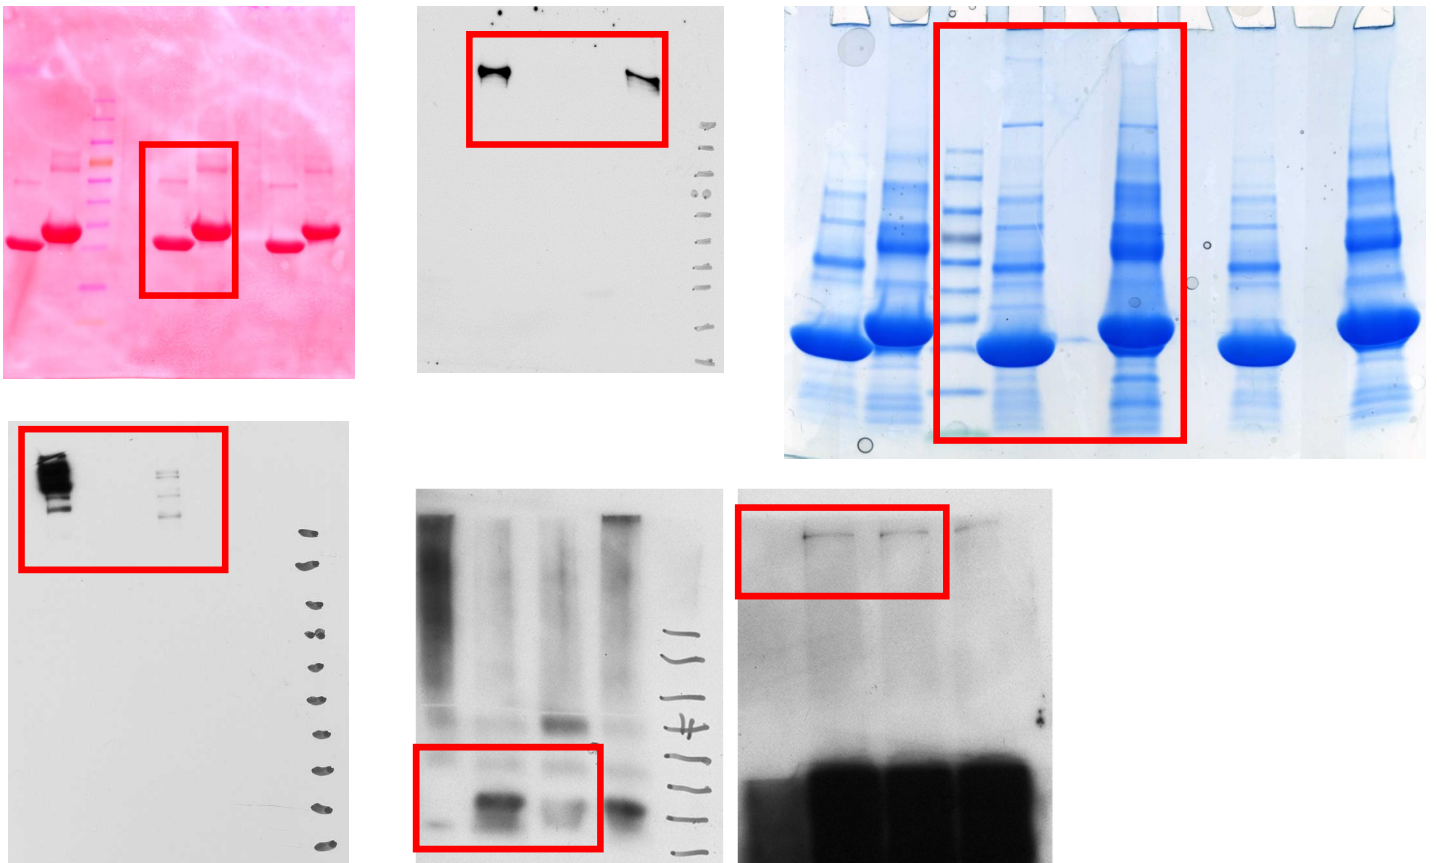

Supplement: NIHMS1549140-supplement-316241_Full_Unedited_Gels.pdf [file NIHMS1549140-supplement-316241_Full_Unedited_Gels.pdf]
